# Supplementary material
Source: PubMed Central journal article supplement (PMC6580856)
Supplement: NIHMS1514929-supplement-Supp1.pdf [file NIHMS1514929-supplement-Supp1.pdf]

## SUPPLEMENTARY MATERIALS

### Recurrent *MED12* exon 2 mutations in benign breast fibroepithelial lesions in adolescents and young adults

Pareja et al.

**Supplementary Table S1:** Primers used for Sanger Sequencing.

**Supplementary Table S2:** *MED12* exon 2 mutations identified in 29 benign breast fibroepithelial lesions in adolescents and young adults, and their predicted pathogenicity.

**Supplementary Table S3:** Clinicopathological features and *MED12* and *TERT* mutational status of fibroadenomas in adolescents and young adults.

**Supplementary Table S4:** Clinicopathological features of fibroadenomas in adolescents and young adults according to *MED12* mutational status.

**Supplementary Table S5:** Clinicopathological features and *MED12* and *TERT* mutational status of benign phyllodes tumors in adolescents and young adults.

**Supplementary Table S6:** Clinicopathological features of benign phyllodes tumors in adolescents and young adults, according to *MED12* mutational status.

**Supplementary Table S1: Primers used for Sanger Sequencing.**

| <b>Gene</b>                                 | <b>Forward</b>                               | <b>Reverse</b>                              |
|---------------------------------------------|----------------------------------------------|---------------------------------------------|
| <i>MED12</i> exon 2<br><i>TERT</i> promoter | TGTTCTACACGGAACCCTCCTC<br>CCAGGGCTTCCCACGTGC | CTGGGCAAATGCCAATGAGAT<br>ACTGGGGACCCGGGCACC |

Supplementary Table S2: *MED12* exon 2 mutations identified in 29 benign breast fibroepithelial lesions in adolescents and young adults, and their predicted pathogenicity.

| Sample ID | Age (years) | Diagnosis | Tumor size (cm) | <i>MED12</i> Amino Acid Change | Effect         | <i>MED12</i> cDNA change | Start Position | End Position | MutationTaster  | Provean     | Polyphen-2        | CADD        | In COSMIC* | COSMIC* Mutation ID | <i>TERT</i> status |
|-----------|-------------|-----------|-----------------|--------------------------------|----------------|--------------------------|----------------|--------------|-----------------|-------------|-------------------|-------------|------------|---------------------|--------------------|
| JF1       | 19          | BePT      | 0.7             | p.G44D                         | Missense       | c.131G>A                 | 70339254       | 70339254     | disease causing | deleterious | probably damaging | deleterious | Yes        | COSM131596          | WT                 |
| JF2       | 21          | FA        | 2.6             | WT                             | NA             | NA                       | NA             | NA           | NA              | NA          | NA                | NA          | NA         | NA                  | WT                 |
| JF3       | 17          | FA        | 6               | p.G44D                         | Missense       | c.131G>A                 | 70339254       | 70339254     | disease causing | deleterious | probably damaging | deleterious | Yes        | COSM131596          | WT                 |
| JF4       | 17          | FA        | 1.2             | WT                             | NA             | NA                       | NA             | NA           | NA              | NA          | NA                | NA          | NA         | NA                  | WT                 |
| JF5       | 18          | BePT      | 1               | p.G44_G53del                   | In-frame indel | c.132_158del             | 70339255       | 70339281     | NA              | deleterious | NA                | deleterious | Yes        | COSM5991498         | WT                 |
| JF6       | 18          | FA        | 1.3             | p.G44S                         | Missense       | c.130G>A                 | 70339253       | 70339253     | disease causing | deleterious | probably damaging | deleterious | Yes        | COSM131594          | WT                 |
| JF7       | 19          | BePT      | 2.2             | p.L39_G53delinsW               | In-frame indel | c.116_157del             | 70339239       | 70339280     | NA              | deleterious | NA                | deleterious | No         | NA                  | WT                 |
| JF8       | 14          | FA        | 1.2             | WT                             | NA             | NA                       | NA             | NA           | NA              | NA          | NA                | NA          | NA         | NA                  | WT                 |
| JF9       | 17          | FA        | 3.6             | p.G44D                         | Missense       | c.131 G>A                | 70339254       | 70339254     | disease causing | deleterious | probably damaging | deleterious | Yes        | COSM131596          | WT                 |
| JF10      | 15          | BePT      | 4.4             | p.L39_A50delinsF               | In-frame indel | c.117_149del             | 70339240       | 70339272     | NA              | deleterious | NA                | deleterious | Yes        | COSM5991544         | WT                 |
| JF11      | 20          | FA        | 0.9             | p.L39_V51del                   | In-frame indel | c.114_152del             | 70339237       | 70339275     | NA              | deleterious | NA                | deleterious | No         | NA                  | WT                 |
| JF12      | 22          | FA        | 2.8             | p.L39_D54del                   | In-frame indel | c.115_162del             | 70339238       | 70339285     | NA              | deleterious | NA                | deleterious | Yes        | COSM5010451         | WT                 |
| JF14      | 23          | FA        | 4.9             | p.G44D                         | Missense       | c.131G>A                 | 70339254       | 70339254     | disease causing | deleterious | probably damaging | deleterious | Yes        | COSM131596          | WT                 |
| JF15      | 19          | FA        | 2.2             | WT                             | NA             | NA                       | NA             | NA           | NA              | NA          | NA                | NA          | NA         | NA                  | WT                 |
| JF16      | 13          | FA        | 10.5            | WT                             | NA             | NA                       | NA             | NA           | NA              | NA          | NA                | NA          | NA         | NA                  | WT                 |
| JF17      | 25          | FA        | 1.5             | p.A38_K42del                   | In-frame indel | c.111_125del             | 70339234       | 70339248     | NA              | deleterious | NA                | deleterious | No         | NA                  | WT                 |
| JF18      | 20          | FA        | 1               | p.N40_P49delinsT               | In-frame indel | c.119_145del             | 70339242       | 70339268     | NA              | deleterious | NA                | deleterious | Yes        | COSM5415276         | WT                 |
| JF19      | 25          | BePT      | 0.9             | p.P49_E55del                   | In-frame indel | c.146_166del             | 70339269       | 70339289     | NA              | deleterious | NA                | deleterious | Yes        | COSM1235335         | WT                 |
| JF20      | 23          | FA        | 2.5             | p.Q43_D54delinsH               | In-frame indel | c.129_161del             | 70339252       | 70339284     | NA              | deleterious | NA                | deleterious | No         | NA                  | WT                 |
| JF21      | 25          | FA        | 3.5             | p.Q48_H56del                   | In-frame indel | c.142_168del             | 70339265       | 70339291     | NA              | deleterious | NA                | deleterious | Yes        | COSM5715352         | WT                 |
| JF24      | 21          | BePT      | 2.4             | p.G44C                         | Missense       | c.130G>T                 | 70339253       | 70339253     | disease causing | deleterious | probably damaging | deleterious | Yes        | COSM131593          | WT                 |
| JF25      | 26          | FA        | 5.8             | WT                             | NA             | NA                       | NA             | NA           | NA              | NA          | NA                | NA          | NA         | NA                  | WT                 |
| JF26      | 17          | FA        | 2.2             | p.G44R                         | Missense       | c.130G>C                 | 70339253       | 70339253     | disease causing | deleterious | probably damaging | deleterious | Yes        | COSM131592          | WT                 |
| JF27      | 24          | FA        | 1               | p.X34_splice                   | Splice-site    | c.100-13_100-1del        | 70339210       | 70339222     | NA              | N/A         | NA                | deleterious | No         | NA                  | WT                 |
| JF28      | 18          | BePT      | 1.3             | WT                             | NA             | NA                       | NA             | NA           | NA              | NA          | NA                | NA          | NA         | NA                  | WT                 |
| JF29      | 18          | FA        | 4               | p.V41_S52del                   | In-frame indel | c.121_156del             | 70339244       | 70339279     | NA              | deleterious | NA                | deleterious | Yes        | COSM5415266         | WT                 |
| JF31      | 18          | FA        | 3.8             | WT                             | NA             | NA                       | NA             | NA           | NA              | NA          | NA                | NA          | NA         | NA                  | WT                 |
| JF32      | 16          | FA        | 4               | WT                             | NA             | NA                       | NA             | NA           | NA              | NA          | NA                | NA          | NA         | NA                  | WT                 |
| JF34      | 18          | BePT      | 1.4             | p.G44_P49del                   | In-frame indel | c.132_146del             | 70339255       | 70339269     | NA              | deleterious | NA                | deleterious | Yes        | COSM6006399         | WT                 |

BePT, benign phyllodes tumor; FA, fibroadenoma; NA, not applicable; WT, wild type

\*COSMIC V84 was used

**Supplementary Table S3: Clinicopathological features and *MED12* and *TERT* mutational status of fibroadenomas in adolescents and young adults.**

| Sample ID | Age (years) | Laterality | Size (cm) | Growth pattern   | <i>MED12</i> mutation | <i>TERT</i> status |
|-----------|-------------|------------|-----------|------------------|-----------------------|--------------------|
| JF2       | 21          | Right      | 2.6       | Pericanalicular  | WT                    | WT                 |
| JF3       | 17          | Left       | 6         | Intracanalicular | p.G44D                | WT                 |
| JF4       | 17          | Right      | 1.2       | Pericanalicular  | WT                    | WT                 |
| JF6       | 18          | Left       | 1.3       | Mixed            | p.G44S                | WT                 |
| JF8       | 14          | Left       | 1.2       | Pericanalicular  | WT                    | WT                 |
| JF9       | 17          | Right      | 3.6       | Intracanalicular | p.G44D                | WT                 |
| JF11      | 20          | Right      | 0.9       | Intracanalicular | p.L39_V51del          | WT                 |
| JF12      | 22          | Left       | 2.8       | Intracanalicular | p.L39_D54del          | WT                 |
| JF14      | 23          | Right      | 4.9       | Intracanalicular | p.G44D                | WT                 |
| JF15      | 19          | Left       | 2.2       | Pericanalicular  | WT                    | WT                 |
| JF16      | 13          | Right      | 10.5      | Pericanalicular  | WT                    | WT                 |
| JF17      | 25          | Right      | 1.5       | Intracanalicular | p.A38_K42del          | WT                 |
| JF18      | 20          | Left       | 1         | Intracanalicular | p.N40_P49delinsT      | WT                 |
| JF20      | 23          | Left       | 2.5       | Intracanalicular | p.Q43_D54delinsH      | WT                 |
| JF21      | 25          | Right      | 3.5       | Intracanalicular | p.Q48_H56del          | WT                 |
| JF25      | 26          | Right      | 5.8       | Pericanalicular  | WT                    | WT                 |
| JF26      | 17          | Left       | 2.2       | Pericanalicular  | p.G44R                | WT                 |
| JF27      | 24          | Right      | 1         | Intracanalicular | p.X34_splice          | WT                 |
| JF29      | 18          | Left       | 4         | Intracanalicular | p.V41_S52del          | WT                 |
| JF31      | 18          | Left       | 3.8       | Pericanalicular  | WT                    | WT                 |
| JF32      | 16          | Left       | 4         | Mixed            | WT                    | WT                 |

WT, wild type

**Supplementary Table S4: Clinicopathological features of fibroadenomas in adolescents and young adults according to *MED12* mutational status.**

| Clinicopathologic feature |                  | <i>MED12</i> <sup>MUT</sup> FAs<br>(n=13) | <i>MED12</i> <sup>WT</sup> FAs<br>(n=8) | <i>p</i> value      |
|---------------------------|------------------|-------------------------------------------|-----------------------------------------|---------------------|
| Age (years)               | Median (range)   | 20 (17-25)                                | 18 (13-26)                              | 0.106 <sup>a</sup>  |
| Size (cm)                 | Median (range)   | 2.5 (0.9-6)                               | 3.2 (1.2-10.5)                          | 0.252 <sup>a</sup>  |
| Growth pattern            | Intracanalicular | 11 (84.6%)                                | 0 (0%)                                  | <0.001 <sup>b</sup> |
|                           | Pericanalicular  | 1 (7.7%)                                  | 1 (12.5%)                               |                     |
|                           | Mixed            | 1 (7.7%)                                  | 7 (87.5%)                               |                     |

FA, fibroadenoma; MUT, mutant; WT, wild-type; <sup>a</sup>Student's t test; <sup>b</sup>Fisher's exact test

**Supplementary Table S5: Clinicopathologic features and *MED12* and *TERT* mutational status of benign phyllodes tumors in adolescents and young adults.**

| Sample ID | Age (years) | Laterality | Size (cm) | Tumor border | Stromal cellularity | Stromal atypia | Stromal overgrowth | Mitoses/ 10 HPF | <i>MED12</i> mutation | <i>TERT</i> status |
|-----------|-------------|------------|-----------|--------------|---------------------|----------------|--------------------|-----------------|-----------------------|--------------------|
| JF1       | 19          | Left       | 0.7       | Well defined | Low                 | Mild           | Absent             | 1               | p.G44D                | WT                 |
| JF5       | 18          | Left       | 1         | Well defined | Low to intermediate | Mild           | Absent             | 2               | p.F45_G53del          | WT                 |
| JF7       | 19          | Left       | 2.2       | Well defined | Low                 | Mild           | Absent             | 1               | p.L39_G53delinsW      | WT                 |
| JF10      | 15          | Right      | 4.4       | Well defined | Low                 | Mild           | Absent             | 0               | p.L39_A50delinsF      | WT                 |
| JF19      | 25          | Right      | 0.9       | Well defined | Low                 | Mild           | Absent             | 0               | p.P49_E55del          | WT                 |
| JF24      | 21          | Right      | 2.4       | Well defined | Low to intermediate | Mild           | Absent             | 1               | p.G44C                | WT                 |
| JF28      | 18          | Right      | 1.3       | Well defined | Low                 | Mild           | Absent             | 1               | WT                    | WT                 |
| JF34      | 18          | Right      | 1.4       | Well defined | Low to intermediate | Mild           | Absent             | 1               | p.F45_P49del          | WT                 |

HPF, high power fields; WT, wild type

**Supplementary Table S6: Clinicopathologic features of benign phyllodes tumors in adolescents and young adults, according to *MED12* mutational status.**

| Clinicopathologic feature |                     | <i>MED12</i> <sup>MUT</sup> Ben PTs (n=7) | <i>MED12</i> <sup>WT</sup> Ben PTs (n=1) | p value            |
|---------------------------|---------------------|-------------------------------------------|------------------------------------------|--------------------|
| Age (years)               | Median (range)      | 19 (15-25)                                | 18 (-)                                   | -                  |
| Size (cm)                 | Median (range)      | 1.4 (0.7-4.4)                             | 1.3 (-)                                  | -                  |
| Tumor border              | Well defined        | 7 (100%)                                  | 1 (100%)                                 | -                  |
| Stromal cellularity       | Low                 | 4 (57.1%)                                 | 1 (100%)                                 | 1.000 <sup>a</sup> |
|                           | Low to intermediate | 3 (42.9%)                                 | 0 (0%)                                   |                    |
| Stromal atypia            | Mild                | 7 (100%)                                  | 1 (100%)                                 | -                  |
| Mitoses/10 HPF            | 0                   | 2 (28.6%)                                 | 0 (0%)                                   | 1.000 <sup>a</sup> |
|                           | 1                   | 4 (57.1%)                                 | 1 (100%)                                 |                    |
|                           | 2                   | 1 (14.3%)                                 | 0 (0%)                                   |                    |
| Stromal overgrowth        | Absent              | 7 (100%)                                  | 1 (100%)                                 | -                  |

<sup>a</sup>Fisher's exact test; HPF, high power field; MUT, mutated, PT, phyllodes tumor; WT, wild-type
